# Supplementary material
Source: PubMed Central journal article supplement (PMC3121218)
Supplement: supp_kwq465_kwq465_Web_Figure_1.pdf [file supp_kwq465_kwq465_Web_Figure_1.pdf]

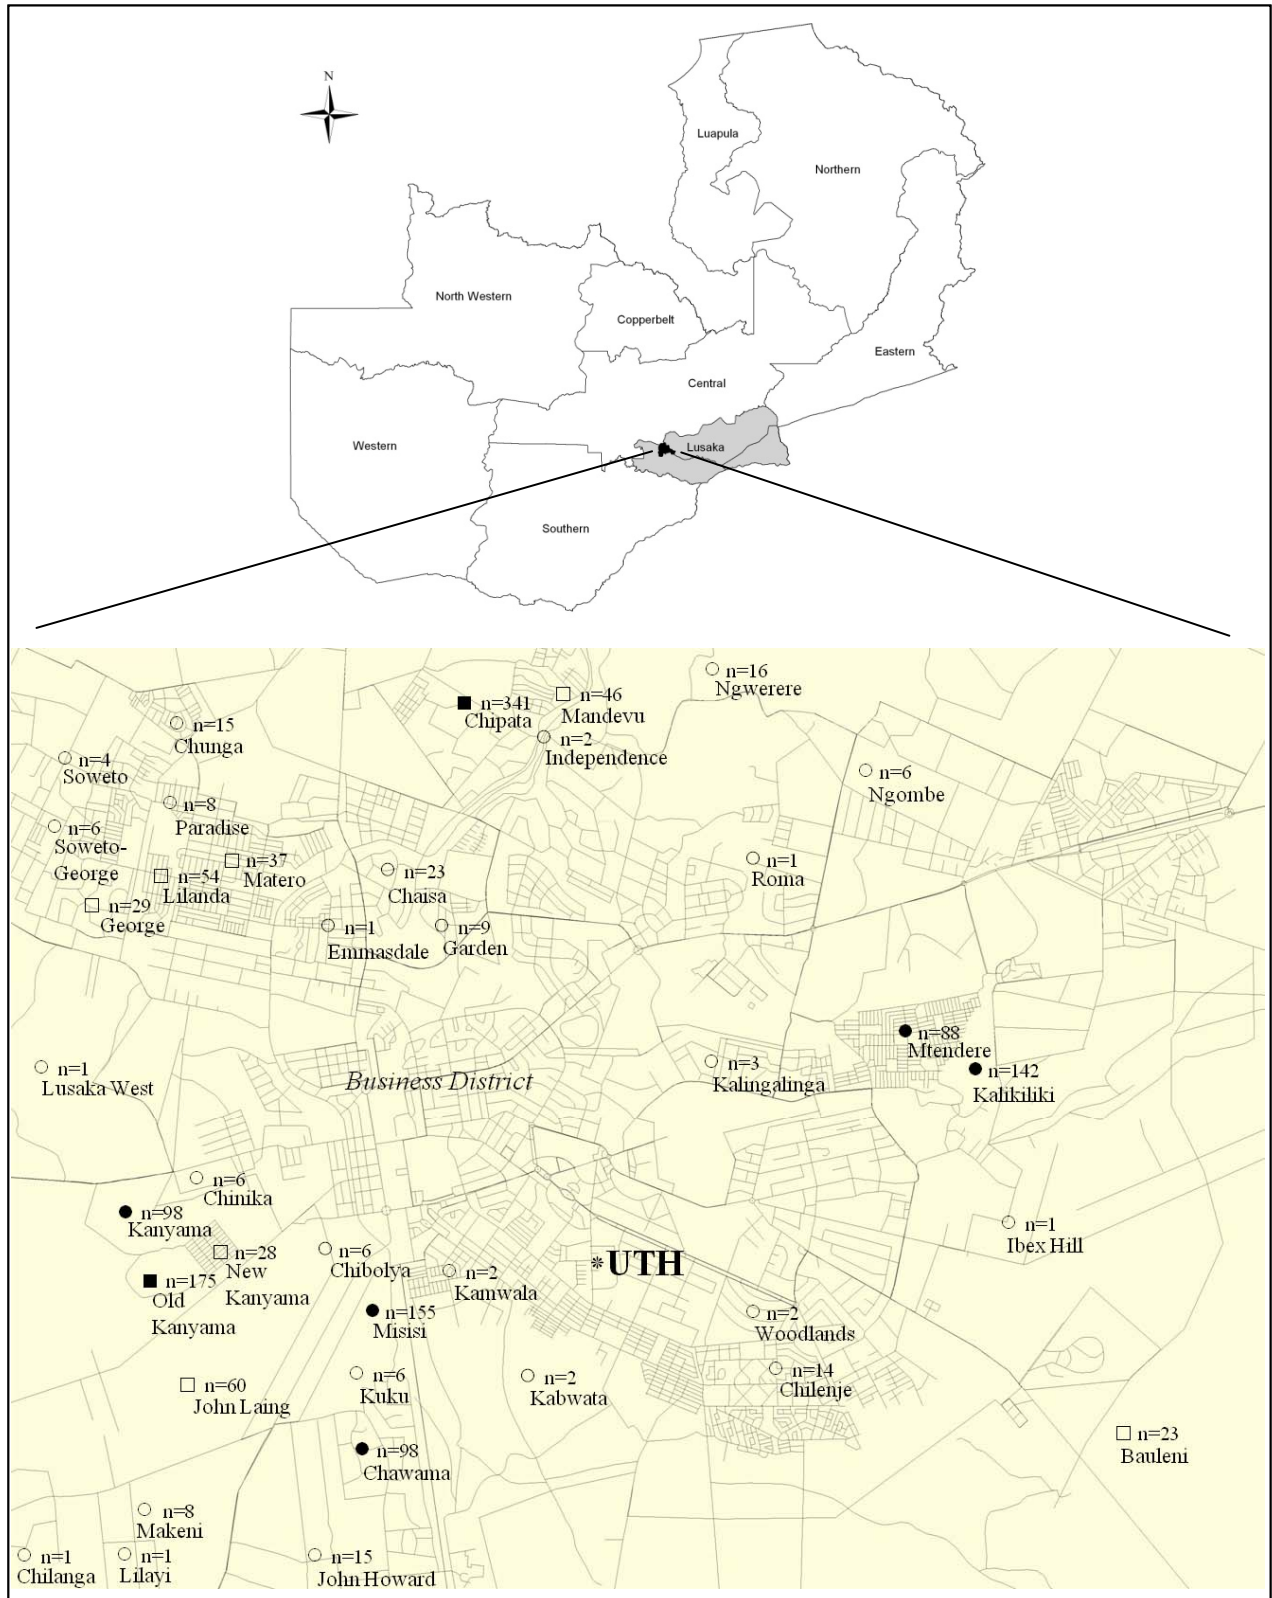

WEB FIGURE 1. Outline Map of Zambia Depicting the Nine Provinces. City of Lusaka, the capital of Zambia, is a part of Lusaka district (shaded black). Lusaka District is a part of Lusaka province (shaded gray). Detailed Area Map of District of Lusaka, Zambia Showing the Distribution of Townships of the Households (N=1600) that were Screened for Enrollment in the Zambia Children's KS-HHV8 study, 2004-2009. No. – Number, UTH – University Teaching Hospital

Note: Number of households (n) enrolled from each township is indicated. Symbols represent the percentage of households enrolled from each township; filled squares-  $\geq 10\%$ , filled circles- 5-9.9%, open squares- 1-4.9%, open circles-  $< 1\%$ .
